# Supplementary material for: Immunogenicity and safety of a live-attenuated SARS-CoV-2 vaccine candidate based on multiple attenuation mechanisms
Source: eLife journal article supplement (doi:10.7554/elife.97532), 2024-04-26
Supplement: fig1-data1 [file elife-97532-fig1-data1-v1.zip]

## Sheet: data
BK2102		Day 0	Day 1	Day 2	Day 3	Day 4	Day 5
32℃	1	3.48299	4.55651	7.29996	8.8506	9.20844	7.77708
	2	3.48299	4.67579	6.82283	8.37348	8.96988	8.37348
	3	3.60227	4.07939	7.41924	8.01564	8.49276	7.89636
37℃	1	3.84083	2.1709	>2.05	>2.05	>2.05	>2.05
	2	3.48299	2.05162	>2.05	>2.05	2.05162	>2.05
	3	3.12514	2.05162	3.00586	>2.05	>2.05	>2.05
B-1		Day 0	Day 1	Day 2	Day 3	Day 4	Day 5
32℃	1	3.3637	4.91435	8.13492	8.61204	8.96988	8.2542
	2	3.72155	4.43723	7.53852	9.08916	8.8506	7.89636
	3	3.72155	4.67579	8.49276	9.32772	8.96988	7.89636
37℃	1	3.60227	6.58427	9.08916	9.08916	7.41924	5.86859
	2	3.48299	6.46499	8.61204	8.8506	7.18067	5.98787
	3	4.07939	6.94211	8.73132	7.6578	7.18067	5.63003
Figure 1- Source data 1
This data corresponds to Figures 1A and B.
Infectious virus titers were determined using the TCID50 method. The limit of detection (LOD) was 2.05 log10 TCID50/mL.
For samples below the LOD, the mean value was set to as 1 log10 TCID50/mL.
