# Supplementary material for: Immunogenicity and safety of a live-attenuated SARS-CoV-2 vaccine candidate based on multiple attenuation mechanisms
Source: eLife journal article supplement (doi:10.7554/elife.97532), 2024-04-26
Supplement: fig1-figsupp1-data1 [file elife-97532-fig1-figsupp1-data1-v1.zip]

## Sheet: Data
		Neutralization titer (2n)
	Animal No.	vs D614G
Candidate 1 102 PFU	1	3
	2	3
	3	3
	4	3
	5	3
Candidate 1 103 PFU	1	7
	2	3
	3	9
	4	10
	5	7
Candidate 1 104 PFU	1	7
	2	9
	3	8
	4	8
	5	8
Candidate 2 102 PFU	1	3
	2	3
	3	3
	4	3
	5	3
Candidate 2 103 PFU	1	3
	2	3
	3	3
	4	3
	5	8
Candidate 2 104 PFU	1	7
	2	3
	3	10
	4	9
	5	3
Candidate 3 102 PFU	1	7
	2	8
	3	8
	4	7
	5	7
Figure 1- figure supplement 1- Source data 1
This data corresponds to Figure 1- figure supplement 1B. Neutralizing antibodies in the sera were measured using SARS-CoV-2 wild-type D614G strains.
The LOD was 24, and for samples below the LOD, the mean value was set to 23.
