# Supplementary material for: Immunogenicity and safety of a live-attenuated SARS-CoV-2 vaccine candidate based on multiple attenuation mechanisms
Source: eLife journal article supplement (doi:10.7554/elife.97532), 2024-04-26
Supplement: fig2-data1 [file elife-97532-fig2-data1-v1.zip]

## Sheet: Data
Naïve
	Animal No.
log2 dilution	1	2	3	4	5	6	7	8	9	10
5	0.052	0.089	0.094	0.123	0.124	0.121	0.07	0.052	0.092	0.05
6	0.034	0.062	0.062	0.096	0.076	0.071	0.051	0.035	0.081	0.035
7	0.024	0.045	0.031	0.071	0.054	0.044	0.034	0.029	0.054	0.022
8	0.016	0.031	0.018	0.045	0.04	0.021	0.025	0.016	0.03	0.015
9	0.01	0.021	0.013	0.026	0.021	0.017	0.016	0.01	0.024	0.011
10	0.004	0.011	0.008	0.013	0.01	0.009	0.005	0.007	0.015	0.005
11	0.006	0.006	0.006	0.009	0.008	0.01	0.007	0.008	0.01	0.007
12	0.01	0.011	0.007	0.012	0.009	0.011	0.007	0.008	0.015	0.008
BK2102 103 PFU
	Animal No.
log2 dilution	1	2	3	4	5	6	7	8	9	10
5	2.948	0.079	2.894	2.891	2.913	2.904	2.868	2.858	2.927	2.947
6	2.929	0.065	2.92	2.893	2.931	2.947	2.855	2.948	2.955	2.97
7	2.918	0.046	2.896	2.9	2.867	2.941	2.747	2.971	3.019	2.959
8	2.913	0.026	2.772	2.908	2.737	2.771	2.635	2.877	2.881	2.762
9	2.903	0.016	2.729	2.876	2.718	2.727	2.404	2.813	2.723	2.607
10	2.613	0.007	2.595	2.741	2.367	2.513	1.971	2.716	2.526	2.35
11	2.255	0.007	2.34	2.482	1.99	2.117	1.467	2.447	2.076	1.921
12	1.925	0.024	2.078	2.162	1.676	1.836	1.059	2.309	1.788	1.538
BK2102 104 PFU
	Animal No.
log2 dilution	1	2	3	4	5	6	7	8	9	10
5	2.914	2.94	2.906	2.941	2.923	0.214	2.881	2.904	2.902	2.939
6	2.977	2.968	2.924	2.956	2.981	0.098	2.944	2.981	2.955	2.983
7	2.903	2.863	2.876	2.897	2.943	0.06	2.937	2.943	2.929	2.95
8	2.907	2.903	2.765	2.882	2.941	0.033	2.942	2.895	2.91	2.951
9	2.785	2.875	2.579	2.749	2.908	0.019	2.872	2.892	2.724	2.934
10	2.589	2.581	2.356	2.446	2.729	0.009	2.739	2.792	2.669	2.846
11	2.277	2.271	1.844	2.072	2.432	0.007	2.5	2.55	2.334	2.603
12	1.794	1.737	1.351	1.569	2.068	0.009	1.991	2.24	1.995	2.322
Figure 2- Source data 1
This data corresponds to Figure 2A. Spike-specific IgG in the sera of BK2102-inoculated hamsters and mock-treated hamsters was detected by ELISA.
The optical density (OD) measured at 450-650 nm with a microplate reader is shown.
