# Supplementary material for: Immunogenicity and safety of a live-attenuated SARS-CoV-2 vaccine candidate based on multiple attenuation mechanisms
Source: eLife journal article supplement (doi:10.7554/elife.97532), 2024-04-26
Supplement: fig2-data2 [file elife-97532-fig2-data2-v1.zip]

## Sheet: Sheet1
		Neutralization titer (2n)
	Animal No.	vs D614G	vs Delta	vs BA.5
Mock	1	4	4	4
	2	4	4	4
	3	4	4	4
	4	4	4	4
	5	4	4	4
	6	4	4	4
	7	4	4	4
	8	4	4	4
	9	4	4	4
	10	4	4	4
103 PFU	1	9	6	4
	2	4	4	4
	3	7	6	4
	4	8	7	4
	5	6	6	4
	6	8	6	4
	7	6	5	4
	8	9	8	4
	9	8	7	4
	10	6	5	4
104 PFU	1	7	6	4
	2	7	6	4
	3	7	6	4
	4	7	5	4
	5	5	5	4
	6	8	8	4
	7	8	7	4
	8	4	4	4
	9	8	7	4
	10	9	8	4
Figure 2- Source data 2
This data corresponds to Figure 2B. Neutralizing antibodies in the sera were measured using the following authentic SARS-CoV-2 strains: wild-type D614G, Delta, and BA.5.
The LOD was 25, and for samples below the LOD, the mean value was set to 24.
