# Supplementary material for: Immunogenicity and safety of a live-attenuated SARS-CoV-2 vaccine candidate based on multiple attenuation mechanisms
Source: eLife journal article supplement (doi:10.7554/elife.97532), 2024-04-26
Supplement: fig2-data3 [file elife-97532-fig2-data3-v1.zip]

## Sheet: Data
103 PFU once	Animal No.
Days post-inoculation	1	2	3	4	5	6	7	8	9	10
14	5	6	6	6	3	7	3	6	7	6
28	7	11	9	6	3	10	3	10	10	11
56	7	10	10	10	3	9	3	11	10	9
84	6	9	8	8	3	8	3	9	10	8
140	6	8	8	8	3	7	3	8	9	8
196	5	8	7	7	3	7	3	8	8	8
252	4	7	7	8	3	7	3	7	8	8
308	4	7	7	6	3	6	3	6	7	6
364	3	6	6	6	3	6	3	6	6	6
103 PFU twice	Animal No.
Days post-inoculation	1	2	3	4	5	6	7	8	9	10
14	6	6	3	8	7	5	5	6	7	7
28	9	9	3	11	8	8	10	10	12	¶
56	10	9	3	10	8	10	9	10	11	¶
84	9	9	3	10	6	8	9	8	11	¶
140	7	8	3	9	6	7	7	7	10	¶
196	8	7	3	9	6	7	8	8	9	¶
252	¶	¶	¶	¶	¶	6	7	7	9	¶
308	¶	¶	¶	¶	¶	5	6	7	8	¶
364	¶	¶	¶	¶	¶	5	6	6	8	¶
104 PFU once	Animal No.
Days post-inoculation	1	2	3	4	5	6	7	8	9	10
14	6	6	6	6	6	6	8	3	8	6
28	11	12	9	11	10	12	11	3	11	10
56	9	9	9	9	10	11	10	3	10	9
84	9	8	8	8	10	10	11	3	9	8
140	7	7	7	8	8	9	9	3	7	9
196	6	8	7	7	9	9	9	3	7	8
252	7	8	7	7	7	7	8	3	7	7
308	6	7	5	6	7	6	8	¶	6	8
364	5	6	6	6	5	7	7	¶	7	6
104 PFU twice	Animal No.
Days post-inoculation	1	2	3	4	5	6	7	8	9	10
14	7	8	7	7	6	8	7	7	8	7
28	10	9	10	10	9	12	9	11	10	10
56	7	10	10	7	11	9	9	11	10	10
84	¶	9	8	9	10	9	9	10	10	9
140	¶	9	10	8	9	9	8	9	9	7
196	¶	9	9	8	7	8	7	8	8	7
252	¶	9	8	7	7	7	7	7	8	7
308	¶	9	9	7	7	7	6	7	8	7
364	¶	8	9	6	6	7	6	6	8	6
Figure 2- Source data 3
This data corresponds to Figure 2C and Figure 2- figure supplement 3. Neutralizing antibodies in the sera were measured using the authentic SARS-CoV-2 wild-type D614G strain.
The LOD was 24, and for samples below the LOD, the mean value was set to 23.
¶ Hamsters died due to aging, fighting, or mishandling.
