# Supplementary material for: Immunogenicity and safety of a live-attenuated SARS-CoV-2 vaccine candidate based on multiple attenuation mechanisms
Source: eLife journal article supplement (doi:10.7554/elife.97532), 2024-04-26
Supplement: fig2-data4 [file elife-97532-fig2-data4-v1.zip]

## Sheet: Data
IFN-g (pg/mL)
	Animal No.	NC	S	N
Naïve	1	39.577	185.755	24.58
	2	46.899	54.574	96.772
	3	618.894	940.487	2072.6
	4	485.846	158.973	83.843
	5	4740.38	1170.55	4213.77
BK2102	1	30.194	5788.43	2123.04
	2	820.997	5754.87	790.532
	3	74.056	29468.8	5520.53
	4	315.328	10906.5	939.258
	5	76.589	13266.4	2456.79
IL-4 (pg/mL)
	Animal No.	NC	S	N
Naïve	1	641.193	607.542	422.552
	2	481.322	978.937	577.404
	3	968.407	804.933	996.511
	4	432.297	514.269	749.967
	5	1180.98	978.937	1063.56
BK2102	1	266.646	1049.41	784.277
	2	610.899	895.01	647.943
	3	767.104	2129.74	926.398
	4	801.487	1451.99	544.09
	5	863.727	1234.74	497.77
Figure 2- Source data 4
This data corresponds to Figures 2D and 2E. IFN-γ and IL-4 in the supernatants were measured with commercially available ELISA kits.
