# Supplementary material for: Immunogenicity and safety of a live-attenuated SARS-CoV-2 vaccine candidate based on multiple attenuation mechanisms
Source: eLife journal article supplement (doi:10.7554/elife.97532), 2024-04-26
Supplement: fig2-data5 [file elife-97532-fig2-data5-v1.zip]

## Sheet: Data
IFN-g (SFC/106 splenocytes)
	Animal No.	Spike	Nucleocapsid
Naïve	1	38	6
	2	502	182
	3	122	0
	4	266	50
BK2102	1	5320	1292
	2	110	266
	3	4776	320
	4	5280	3812
Figure 2- Source data 5
This data corresponds to Figure 2F. IFN-γ-secreting splenocytes were quantified by ELISPOT.
