# Supplementary material for: Immunogenicity and safety of a live-attenuated SARS-CoV-2 vaccine candidate based on multiple attenuation mechanisms
Source: eLife journal article supplement (doi:10.7554/elife.97532), 2024-04-26
Supplement: fig2-figsupp1-data1 [file elife-97532-fig2-figsupp1-data1-v1.zip]

## Sheet: Data
		Neutralization titer (2n)
	Animal No.	vs D614G
Naïve	1	2
	2	2
	3	2
	4	2
	5	2
S-mRNA	1	6
	2	5
	3	4
	4	4
	5	5
BK2102 once	1	6
	2	2
	3	7
	4	7
	5	6
BK2102 twice	1	8
	2	6
	3	6
	4	5
	5	5
Figure 2- figure supplement 1- Source data 1
This data corresponds to Figure 2- figure supplement 1A. Neutralizing antibodies in the sera were measured using SARS-CoV-2 wild-type D614G strains.
The LOD was 23, and for samples below the LOD, the mean value was set to 22.
