# Supplementary material for: Immunogenicity and safety of a live-attenuated SARS-CoV-2 vaccine candidate based on multiple attenuation mechanisms
Source: eLife journal article supplement (doi:10.7554/elife.97532), 2024-04-26
Supplement: fig2-figsupp1-data2 [file elife-97532-fig2-figsupp1-data2-v1.zip]

## Sheet: Data
Spike-specific IgA titer
	Animal No.	IgA titer (2n)
Naïve	1	0
	2	0
	3	3.1602
	4	0
	5	0
S-mRNA	1	1.35311
	2	1.64615
	3	1.9571
	4	1.34946
	5	0.0802135
BK2102 once	1	3.72794
	2	2.58105
	3	#
	4	3.94497
	5	4.1663
BK2102 twice	1	5.39101
	2	5.89982
	3	5.23958
	4	0
	5	5.63996
Figure 2- figure supplement 1- Source data 2
This data corresponds to Figure 2- figure supplement 1B. SARS-CoV-2 spike-specific IgA measured via ELISA
#Not used for IgA measurement because the nasal wash was contaminated with blood.
