# Supplementary material for: Immunogenicity and safety of a live-attenuated SARS-CoV-2 vaccine candidate based on multiple attenuation mechanisms
Source: eLife journal article supplement (doi:10.7554/elife.97532), 2024-04-26
Supplement: fig2-figsupp1-data3 [file elife-97532-fig2-figsupp1-data3-v1.zip]

## Sheet: Data
Total IgG
		Serum dilution (2n)
	Animal No.	8	10	12
Naïve	1	0.021875	0.006875	0.002875
	2	0.029875	0.009875	-0.000125
	3	0.023875	0.006875	0
	4	0.036875	0.013875	0.002875
	5	0.024875	0.005875	0.000875
S-mRNA	1	2.42525	2.04525	1.39425
	2	2.29125	1.86225	1.15925
	3	2.21625	1.76325	1.04125
	4	2.15925	1.66425	0.97225
	5	2.13825	1.71025	1.02525
BK2102 once	1	2.23525	1.97325	1.35025
	2	0.03725	0.00825	0.00225
	3	2.30325	2.08425	1.46925
	4	2.29525	1.81125	1.13525
	5	2.28225	1.95025	1.32225
BK2102 twice	1	2.21888	1.99987	1.46188
	2	2.18087	1.86987	1.27487
	3	2.06487	1.61688	0.986875
	4	1.80888	1.40287	0.742875
	5	2.18325	1.85925	1.14625
IgG1
		Serum dilution (2n)
	Animal No.	5	7	9
Naïve	1	0	0	0
	2	0	0	0
	3	0	0	0
	4	0	0	0
	5	0	0	0
S-mRNA	1	3.07787	3.04987	1.65787
	2	2.96988	1.21488	0.068875
	3	2.95187	0.661875	0.033875
	4	2.71188	0.465875	0.023875
	5	3.18287	3.06187	0.935875
BK2102 once	1	0	0	0
	2	0	0	0
	3	0	0	0
	4	0	0	0
	5	0	0	0
BK2102 twice	1	0	0	0
	2	0	0	0
	3	0	0	0
	4	0	0	0
	5	0	0	0
IgG2/3
		Serum dilution (2n)
	Animal No.	8	10	12
Naïve	1	0.009375	0.005375	0.000375
	2	0.021375	0.007375	0
	3	0.005375	0.000375	0.005375
	4	0.010375	0.001375	0
	5	0.004375	0	0.001375
S-mRNA	1	3.123	2.942	0.951
	2	3.095	2.518	0.499
	3	3.174	2.182	0.335
	4	3.12	1.986	0.344
	5	3.16	2.253	0.501
BK2102 once	1	3.123	2.97	1.053
	2	0.013	0.003	0.003
	3	3.149	3.258	1.651
	4	3.09863	2.72063	0.491625
	5	3.25263	2.87962	0.789625
BK2102 twice	1	3.20538	3.03938	1.79038
	2	3.18038	2.92937	0.962375
	3	3.19638	3.02537	1.25737
	4	3.05337	2.02738	0.338375
	5	3.03	2.74	0.521
Figure 2- figure supplement 1- Source data 3
This data corresponds to Figure 2- figure supplement 1C. Spike-specific IgG in the sera was detected by ELISA.
The optical density (OD) measured at 450-650 nm with a microplate reader is shown.
