# Supplementary material for: Immunogenicity and safety of a live-attenuated SARS-CoV-2 vaccine candidate based on multiple attenuation mechanisms
Source: eLife journal article supplement (doi:10.7554/elife.97532), 2024-04-26
Supplement: fig2-figsupp1-data4 [file elife-97532-fig2-figsupp1-data4-v1.zip]

## Sheet: Data
Total IgG
		Serum dilution (2n)
	Animal No.	8	10	12
Naïve	1	0.018	0.008	0.005
	2	0.043	0.014	0.016
	3	0.024	0.007	0.008
Spike + Alum	1	0.506	0.161	0.044
	2	2.92	2.508	1.593
	3	2.14	1.043	0.354
BK2102	1	2.955	2.745	2.04
	2	2.915	2.761	2.217
	3	2.843	2.559	1.748
	4	2.749	2.206	1.307
IgG1
		Serum dilution (2n)
	Animal No.	5	7	9
Naïve	1	0.042	0.023	0.025
	2	0.055	0.018	0.023
	3	0.039	0.016	0.013
Spike + Alum	1	1.767	0.057	0.033
	2	3.109	3.079	0.625
	3	3.094	0.248	0.029
BK2102	1	0.033	0.02	0.023
	2	0.035	0.03	0.03
	3	0.106	0.024	0.029
	4	0.056	0.019	0.035
IgG2/3
		Serum dilution (2n)
	Animal No.	8	10	12
Naïve	1	0.019	0.024	0.002
	2	0.023	0.028	0.005
	3	0.021	0.011	0.002
Spike + Alum	1	0.003	0.031	0.004
	2	1.033	0.415	0.07
	3	0.265	0.09	0.012
BK2102	1	1.216	0.804	0.227
	2	1.102	0.845	0.327
	3	1.014	0.624	0.144
	4	0.877	0.386	0.058
Figure 2- figure supplement 1- Source data 3
This data corresponds to Figure 2- figure supplement 1D. Spike-specific IgG in the sera was detected by ELISA.
The optical density (OD) measured at 450-650 nm with a microplate reader is shown.
