# Supplementary material for: Immunogenicity and safety of a live-attenuated SARS-CoV-2 vaccine candidate based on multiple attenuation mechanisms
Source: eLife journal article supplement (doi:10.7554/elife.97532), 2024-04-26
Supplement: fig2-figsupp2-data1 [file elife-97532-fig2-figsupp2-data1-v1.zip]

## Sheet: Data
Neutralization titer (2n)
	Days post-inoculation
Animal No.	0	28	35	42
1	2	4	4	5
2	2	2	2	2
3	2	2	2	2
4	2	8	7	7
Figure 2- figure supplement 2- Source data 1
This data corresponds to Figure 2- figure supplement 2A. Neutralizing antibodies in the sera were measured using SARS-CoV-2 wild-type D614G strains.
The LOD was 23, and for samples below the LOD, the mean value was set to 22.
