# Supplementary material for: Immunogenicity and safety of a live-attenuated SARS-CoV-2 vaccine candidate based on multiple attenuation mechanisms
Source: eLife journal article supplement (doi:10.7554/elife.97532), 2024-04-26
Supplement: fig2-figsupp2-data2 [file elife-97532-fig2-figsupp2-data2-v1.zip]

## Sheet: Data
	Animal No.	SARS-CoV-2 pseudovirus neutralization titer (2n)
Naïve	1	2
	2	2
	3	2
	4	2
	5	2
	6	2
BK2102 107 PFU	1	6.44493
	2	4.40939
	3	7.61692
	4	9.84439
	5	6.14241
	6	5.04876
Figure 2- figure supplement 2- Source data 2
This data corresponds to Figure 2- figure supplement 2B. Neutralizing antibodies in the sera were measured using SARS-CoV-2 pseudovirus.
The LOD was 23.8, and for samples below the LOD, the mean value was set to 22.
