# Supplementary material for: Immunogenicity and safety of a live-attenuated SARS-CoV-2 vaccine candidate based on multiple attenuation mechanisms
Source: eLife journal article supplement (doi:10.7554/elife.97532), 2024-04-26
Supplement: fig2-figsupp4-data1 [file elife-97532-fig2-figsupp4-data1-v1.zip]

## Sheet: Data
		Neutralization titer (2n)
	Animal No.	vs D614G	vs Gamma
Naïve	1	3	3
	2	3	3
	3	3	3
	4	3	3
	5	3	3
BK2102 103 PFU	1	9	6
	2	11	5
	3	9	5
	4	10	3
BK2102 104 PFU	1	10	7
	2	11	8
	3	8	6
	4	8	6
	5	8	6
Figure 2- figure supplement 4- Source data 1
This data corresponds to Figure 2- figure supplement 4A. Neutralizing antibodies in the sera were measured using SARS-CoV-2 wild-type D614G and gamma strain.
The LOD was 24, and for samples below the LOD, the mean value was set to 23.
