# Supplementary material for: Immunogenicity and safety of a live-attenuated SARS-CoV-2 vaccine candidate based on multiple attenuation mechanisms
Source: eLife journal article supplement (doi:10.7554/elife.97532), 2024-04-26
Supplement: fig3-data1 [file elife-97532-fig3-data1-v1.zip]

## Sheet: Data
D614G challenge
Body weight (%)		Days post-challenge
	Animal No.	0	1	2	3	4
Naïve	1	100	97.7341	93.8066	92.0695	90.6344
	2	100	96.7985	92.467	90.5838	88.7006
	3	100	98.3369	94.6493	90.6725	89.2986
	4	100	97.2288	94.616	93.27	92.5574
	5	100	97.7778	93.5354	93.1313	91.2121
103 PFU	1	100	94.7977	94.7977	99.6146	101.06
	2	100	97.0136	96.6516	93.0317	94.3891
	3	100	96.9286	94.7606	99.3677	101.174
	4	100	96.3836	95.9906	97.7201	100
	5	100	95.2381	96	96	95.2381
104 PFU	1	100	97.9791	98.8153	99.7909	101.045
	2	100	94.8571	95.1429	96.9524	97.8095
	3	100	98.4568	98.4568	99.0741	99.1512
	4	100	97.5197	98.8726	103.269	104.397
	5	100	96.1961	96.8724	99.6619	100.93
BA.5 challenge
Body weight (%)		Days post-challenge
	Animal No.	0	1	2	3	4
Naïve	1	100	98.9961	98.9961	97.4517	94.5946
	2	100	98.6235	95.9394	91.8789	89.7454
	3	100	98.2226	97.5678	96.4453	96.4453
	4	100	99.0099	97.5698	96.3096	95.5896
	5	100	99.1055	97.4061	95.1699	94.186
103 PFU	1	100	96.8095	94.6217	93.1632	92.2516
	2	100	98.4526	98.646	98.646	94.3907
	3	100	97	98.8	102.5	103.2
	4	100	98.2041	98.9388	101.061	100.98
	5	100	98.5577	98.3974	100.16	101.362
104 PFU	1	100	102.469	102.058	104.527	105.247
	2	100	101.852	102.778	104.444	107.222
	3	100	100.517	102.068	104.033	106.205
	4	100	100.548	101.92	103.016	105.302
	5	100	100.571	101.633	102.367	102.041
Figure 3- Source data 1
This data corresponds to Figures 3A (D614G challenge) and 3B (BA.5 challenge). Body weight is expressed as a percentage of the initial weight.
