# Supplementary material for: Immunogenicity and safety of a live-attenuated SARS-CoV-2 vaccine candidate based on multiple attenuation mechanisms
Source: eLife journal article supplement (doi:10.7554/elife.97532), 2024-04-26
Supplement: fig3-data2 [file elife-97532-fig3-data2-v1.zip]

## Sheet: Data
D614G challenge
	Animal No.	Lung (PFU/g)	Nasal wash (PFU/mL)
Naïve	1	6.36696	3.55871
	2	6	3.64147
	3	5.92621	3.82347
	4	6.11539	3.60423
	5	5.93554	3.80346
103 PFU	1	1	1
	2	1	3.76641
	3	1	1
	4	6.43798	1
	5	1	1
104 PFU	1	1	1.60206
	2	1	1.60206
	3	1	1.30103
	4	1	1
	5	1	1
BA.5 challenge
	Animal No.	Lung (PFU/g)	Nasal wash (PFU/mL)
Naïve	1	5.24715	2.89209
	2	5.01336	3.31387
	3	3.05505	2.25527
	4	4.85106	2.62325
	5	4.716	1
103 PFU	1	1	1
	2	1	1
	3	1	1
	4	1	1
	5	1	1
104 PFU	1	4.15229	2.44716
	2	1	1
	3	1	1
	4	1	1
	5	1	1
Figure 3- Source data 2
This data corresponds to Figures 3C, 3D (D614G challenge), 3F and 3G (BA.5 challenge).
The infectious virus titer in the lungs and nasal wash specimens taken on day four post-challenge was measured via a plaque assay.
The LOD was 1.3 log10 PFU/g or PFU/mL.
For samples below the LOD, the mean value was set to as 1.0 log10 PFU/g or PFU/mL.
