# Supplementary material for: Immunogenicity and safety of a live-attenuated SARS-CoV-2 vaccine candidate based on multiple attenuation mechanisms
Source: eLife journal article supplement (doi:10.7554/elife.97532), 2024-04-26
Supplement: fig3-data3 [file elife-97532-fig3-data3-v1.zip]

## Sheet: Data
D614G challenge
Inflammation
	Animal No.	Score
Naïve	1	2
	2	3
	3	3
	4	1
	5	2
103 PFU	1	1
	2	2
	3	1
	4	0
	5	2
104 PFU	1	1
	2	0
	3	0
	4	1
	5	1
0: Not remarkable 1: Minimal 2: Mild 3: Moderate
BA.5 challenge
Inflammation
	Animal No.	Score
Naïve	1	1
	2	3
	3	3
	4	1
	5	3
103 PFU	1	1
	2	3
	3	1
	4	2
	5	3
104 PFU	1	0
	2	0
	3	1
	4	2
	5	1
0: Not remarkable 1: Minimal 2: Mild 3: Moderate
Figure 3- Source data 3
This data corresponds to Figures 3E (D614G challenge) and 3H (BA.5 challenge). Lung inflammation scores were determined via H&E staining.
