# Supplementary material for: Immunogenicity and safety of a live-attenuated SARS-CoV-2 vaccine candidate based on multiple attenuation mechanisms
Source: eLife journal article supplement (doi:10.7554/elife.97532), 2024-04-26
Supplement: fig3-data4 [file elife-97532-fig3-data4-v1.zip]

## Sheet: Data
Body weight (%)
		Days post-challenge
	Animal No.	0	1	2	3	4	6	7	8	9	10
Naïve	1	100	99.1031	97.1599	96.7613	96.6617	91.131	88.0419	87.5436	88.6398	89.3373
	2	100	98.8163	95.4195	93.5152	91.6624	86.9274	84.9717	85.0232	84.7144	86.2069
	3	100	97.1061	94.2122	91.3183	90.3001	84.7803	82.5831	83.6013	85.0482	86.0129
	4	100	98.6361	96.1266	90.6165	90.1255	85.9247	85.9793	86.1975	87.6159	89.4163
	5	100	98.1058	94.7075	92.5348	91.3649	86.4624	84.4568	85.2368	86.6852	88.1337
		Days post-challenge
	Animal No.	0	1	2	3	4	6	7	8	9	10
103 PFU once	1	100	98.5104	96.0278	94.8858	95.7299	93.4459	93.2473	92.999	93.9424	94.8858
	2	100	98.9263	94.7029	93.5576	94.4166	90.8375	90.8375	92.6271	93.2713	94.4882
	3	100	97.7237	95.9767	96.2943	96.4531	95.0238	95.2885	96.7708	97.406	96.8767
	4	100	97.1261	95.6891	94.3828	93.7949	94.1868	93.8602	94.5134	94.9053	95.0359
	5	100	99.0215	95.0424	93.8682	94.3249	93.3464	93.9987	94.3249	94.9119	94.7162
		Days post-challenge
	Animal No.	0	1	2	3	4	6	7	8	9	10
103 PFU twice	1	100	97.2692	94.3433	93.8231	93.0429	91.3524	91.9376	93.238	94.4733	95.2536
	2	100	97.9072	95.8145	94.6833	94.3439	93.8348	93.7783	94.0045	95.2489	95.3054
	3	100	98.0963	94.1769	94.5689	94.6809	94.6249	94.2329	96.0806	96.7525	97.0885
	4	100	97.3394	95.0681	94.4841	94.9384	96.1713	95.6522	96.5607	96.6256	98.9617
		Days post-challenge
	Animal No.	0	1	2	3	4	6	7	8	9	10
104 PFU once	1	100	97.6857	92.8418	91.7653	90.4736	87.944	87.4058	88.5361	88.7513	88.6975
	2	100	97.193	94.6784	93.5673	93.0994	92.1637	92.807	93.2749	93.5673	93.9181
	3	100	96.6775	96.2215	95.8306	96.3518	94.3322	95.1792	96.0912	96.3518	96.8078
	4	100	98.0958	95.5568	94.2297	93.4218	92.7294	93.768	93.768	93.7103	94.0565
	5	100	99.2403	94.4751	93.3702	93.232	94.8895	96.2707	95.9945	96.8923	97.0994
		Days post-challenge
	Animal No.	0	1	2	3	4	6	7	8	9	10
104 PFU twice	1	100	98.6507	95.3523	96.6267	96.5517	97.4513	98.5007	97.901	98.051	97.4513
	2	100	98.324	95.2514	94.0782	92.7374	91.676	94.4134	94.3575	94.6369	93.8547
	3	100	98.0583	95.0971	94.5146	94.0291	92.4272	92.0874	92.4757	92.5243	91.3592
	4	100	97.2325	96.064	95.3875	95.1415	93.6039	95.449	96.187	96.9865	96.6175
	5	100	98.5993	94.458	93.7881	92.9354	91.352	92.3264	91.7783	91.9001	89.8904
Figure 3- Source data 4
This data corresponds to Figure 3I. Weight changes after the challenge with D614G strain.
Body weight is expressed as a percentage of the initial weight.
