# Supplementary material for: Immunogenicity and safety of a live-attenuated SARS-CoV-2 vaccine candidate based on multiple attenuation mechanisms
Source: eLife journal article supplement (doi:10.7554/elife.97532), 2024-04-26
Supplement: fig3-figsupp1-data1 [file elife-97532-fig3-figsupp1-data1-v1.zip]

## Sheet: Data
Gamma challenge
Body weight (%)		Days post-infection
	Animal No.	0	1	2	3	4	5	6	7	8
Naïve	1	100	97.1399	94.0756	92.952	89.6834	87.334	87.1297	89.8876	92.5434
	2	100	98.3649	96.8158	98.1067	97.5043	94.6644	90.1893	88.21	90.5336
	3	100	98.3425	95.2644	95.5012	94.7119	92.1863	89.9763	91.397	95.4223
	4	100	97.4674	94.7178	93.343	92.7641	90.521	87.3372	85.3835	84.081
	5	100	98.6183	96.8048	98.6183	98.1002	94.9914	91.3644	90.7599	94.2142
103 PFU	1	100	95.614	95.614	95.8333	96.1623	98.6842	99.3421	101.645	102.961
	2	100	96.4684	97.4907	98.8848	98.0483	99.7212	101.673	102.23	102.695
	3	100	96.1111	95	95	94.537	93.9815	94.7222	96.7593	97.963
	4	100	97.3946	97.6245	99.387	99.6169	100.077	94.7893	103.755	104.751
104 PFU	1	100	97.3579	96.6373	96.4772	96.0769	94.7958	96.3971	96.8775	97.5981
	2	100	96.2963	96.2963	96.8148	97.4074	97.8519	98.7407	99.4074	100.37
	3	100	96.2302	96.3294	98.5119	100.099	101.19	102.976	106.548	107.044
	4	100	95.2727	94.9091	97	98	99.2727	99.7273	101.091	101.545
	5	100	95.3642	96.3576	97.1854	98.3444	99.0894	100.414	102.152	103.311
Figure 3- figure supplement 1- Source data 1
This data corresponds to Figure 3-figure supplement 1B. Body weight is expressed as a percentage of the initial weight.
