# Supplementary material for: Immunogenicity and safety of a live-attenuated SARS-CoV-2 vaccine candidate based on multiple attenuation mechanisms
Source: eLife journal article supplement (doi:10.7554/elife.97532), 2024-04-26
Supplement: fig3-figsupp2-data1 [file elife-97532-fig3-figsupp2-data1-v1.zip]

## Sheet: Data
D614G challenge
Body weight (%)		Days post-infection
	Animal No.	0	1	2	3	6
Naïve	Co-housed animal 1	100	100.725	101.449	100.362	94.6377
	Challenged animal 1	100	101.23	102.529	101.162	88.8585
	Co-housed animal 2	100	101.077	102.462	101.077	97.2308
	Challenged animal 2	100	99.3305	97.4895	96.9874	97.9916
	Co-housed animal 3	100	99.5819	99.0803	99.3311	96.7391
	Challenged animal 3	100	95.4401	92.0467	91.7285	88.017
BK2102 i.n.	Co-housed animal 1	100	101.299	102.679	101.623	106.331
	Challenged animal 1	100	101.476	104.982	105.72	110.148
	Co-housed animal 2	100	102.391	104.641	104.501	106.048
	Challenged animal 2	100	99.5475	99.6229	99.3967	103.394
	Co-housed animal 3	100	99.9255	102.683	101.937	100.075
	Challenged animal 3	100	99.6918	100.462	102.388	107.011
Spike+Alum i.m.	Co-housed animal 1	100	99.7869	98.7926	97.3011	92.1165
	Challenged animal 1	100	93.8869	90.146	88.4124	90.7847
	Co-housed animal 2	100	102.131	101.847	99.6449	98.3665
	Challenged animal 2	100	100.093	100.466	101.771	108.574
	Co-housed animal 3	100	97.0274	95.8841	94.9695	96.4939
	Challenged animal 3	100	96.9828	97.8448	97.7371	105.172
Figure 3- figure supplement 2- Source data 1
This data corresponds to Figure 3-figure supplement 2B . Body weight is expressed as a percentage of the initial weight.
