# Supplementary material for: Immunogenicity and safety of a live-attenuated SARS-CoV-2 vaccine candidate based on multiple attenuation mechanisms
Source: eLife journal article supplement (doi:10.7554/elife.97532), 2024-04-26
Supplement: fig4-figsupp2-data1 [file elife-97532-fig4-figsupp2-data1-v1.zip]

## Sheet: Data
Body weight (%)
		p-0		p-1		p-2		p-3
		Days post-infection		Days post-infection		Days post-infection		Days post-infection
	Animal No.	0	3	0	3	0	3	0	3
BK2102	1	100	109.965	100	99.1587	100	107.262	100	105.2
	2	100	100.128	100	103.626	100	105.315	100	103.319
	3	100	108.079	100	105.247	100	103.412	100	101.681
	4	100	110.01	100	103.686	100	105.857	100	105.462
	5	100	109.034	100	105.952	100	101.923	100	104.329
	Average	100	107.443	100	103.534	100	104.754	100	103.998
	SD	0	4.16502	0	2.64381	0	2.09963	0	1.54347
		p-0		p-1		p-2		p-3
		Days post-infection		Days post-infection		Days post-infection		Days post-infection
	Animal No.	0	3	0	3	0	3	0	3
A50-18	1	100	111.566	100	96.875	100	87.1731	100	96.8188
	2	100	107.497	100	99.3893	100	96.75	100	93.8974
	3	100	105.622	100	94.3038	100	97.4436	100	92.5926
	4	100	103.892	100	97.0468	100	104.755	100	103.158
	5	100	105.444	100	100.202	100	95.389	100	92.5
	Average	100	106.804	100	97.5634	100	96.3021	100	95.7933
	SD	0	2.95291	0	2.32712	0	6.26747	0	4.4714
Figure 4- Figure supplement 2- Source data 2
This data corresponds to Figure 4- figure supplement 2. Body weight is expressed as a percentage of the initial weight.
