# Supplementary material for: Immunogenicity and safety of a live-attenuated SARS-CoV-2 vaccine candidate based on multiple attenuation mechanisms
Source: eLife journal article supplement (doi:10.7554/elife.97532), 2024-04-26
Supplement: fig5-data1 [file elife-97532-fig5-data1-v1.zip]

## Sheet: Data
Body weight (%)
		Days post-infection
	Animal No.	0	1	2	3	4	5	6	7	8	9	10	11	12	13	14
Mock	1	100	97.2647	99.2759	102.896	102.092	*	102.896	*	*	*	100.523	98.5519	*	*	*
	2	100	98.5307	98.976	104.452	102.538	*	104.096	*	*	*	104.898	103.651	*	*	*
	3	100	95.8124	98.325	99.9581	98.325	*	97.6549	*	*	*	98.4087	99.5812	*	*	*
	4	100	96.7072	98.8349	106.028	102.28	*	102.989	*	*	*	102.381	102.837	*	*	*
D614G 102 PFU	1	100	99.9621	99.4316	#
	2	100	103.567	100.431	84.9863	#
	3	100	97.3115	92.5574	#
	4	100	103.176	98.211	84.2643	82.9135	#
	5	100	100.086	100.858	#
B-1 ΔFCS 102 PFU	1	100	99.4213	94.2134	#
	2	100	103.13	100.065	88.4252	#
	3	100	101.455	95.3654	84.8782	#
	4	100	96.2469	94.5788	#
	5	100	104.362	93.3725	#
L50-33 103 PFU	1	100	96.352	93.3881	99.3616	95.7592	*	99.6352	*	*	*	100.365	100.274	*	*	*
	2	100	102.148	95.7474	99.055	97.7234	*	99.055	*	*	*	103.136	100.945	*	*	*
	3	100	100.468	101.546	106.557	102.81	*	102.482	*	*	*	101.733	102.717	*	*	*
	4	100	99.0617	96.8722	101.34	99.1957	*	101.787	*	*	*	104.111	101.832	*	*	*
L50-33 104 PFU	1	100	99.3428	100.253	103.033	100.506	*	98.9889	*	*	*	62.9424	0	*	*	*
	2	100	97.4371	96.3733	96.1315	94.4391	*	100.629	*	*	*	102.611	106.48	*	*	*
	3	100	97.6266	98.0222	98.4177	93.394	*	96.8354	*	*	*	103.165	103.244	*	*	*
	4	100	98.9703	98.5347	103.248	101.109	*	102.218	*	*	*	98.4554	100.832	*	*	*
L50-33 105 PFU	1	100	91.8089	94.198	103.242	102.218	*	101.451	*	*	*	101.024	100.853	*	*	*
	2	100	100.463	100	108.387	105.051	*	101.807	*	*	*	67.2845	0	*	*	*
	3	100	100.296	98.0574	100.718	100.338	*	97.3818	*	*	*	107.264	106.799	*	*	*
	4	100	97.4554	98.4375	102.411	100.893	*	105.357	*	*	*	104.196	104.688	*	*	*
A50-18 106 PFU	1	100	101.498	*	99.1935	100.307	102.65	101.997	100.653	*	*	*	*	*	*	*
	2	100	97.9854	*	100.643	99.2285	99.1856	97.6425	98.1569	*	*	*	*	*	*	*
	3	100	101.47	*	100.188	98.04	99.6608	100.075	102.035	*	*	*	*	*	*	*
	4	100	103.513	*	103.24	102.732	104.254	104.957	107.143	*	*	*	*	*	*	*
	5	100	101.555	*	100.993	100.596	101.919	101.952	99.8345	*	*	*	*	*	*	*
Figure 5 and Figure 5-figure supplement 1- Source data 1
This data corresponds to Figure 5A and Figure 5-figure supplement 1B. Body weight is expressed as a percentage of the initial weight.
# No data due to death.
* No weight measurement, only survival determination.
