# Supplementary material for: Immunogenicity and safety of a live-attenuated SARS-CoV-2 vaccine candidate based on multiple attenuation mechanisms
Source: eLife journal article supplement (doi:10.7554/elife.97532), 2024-04-26
Supplement: fig5-data2 [file elife-97532-fig5-data2-v1.zip]

## Sheet: Data
Body weight (%)		Days post-infection
	Animal No.	0	1	2	3	4	5	6	7	8	9	10	11	12	13	14
Mock	1	100	102.491	*	102.145	101.315	98.4775	97.1972	99.5848	*	*	*	*	*	*	*
	2	100	99.7423	*	100.687	100	99.6993	100.73	98.7973	*	*	*	*	*	*	*
	3	100	101.729	*	99.5774	100.192	102.574	105.878	105.378	*	*	*	*	*	*	*
	4	100	99.1007	*	99.6852	98.1115	98.4263	100.315	101.933	*	*	*	*	*	*	*
	5	100	101.773	*	100.724	100.688	107.854	108.578	106.804	*	*	*	*	*	*	*
BK2102 106 PFU	1	100	104.547	*	106.276	106.013	106.426	106.351	107.478	*	*	*	*	*	*	*
	2	100	102.652	*	103.258	102.841	101.515	100.53	98.9394	*	*	*	*	*	*	*
	3	100	107.929	*	113.408	111.002	113.185	111.849	114.833	*	*	*	*	*	*	*
	4	100	105.813	*	104.977	103.267	103.191	104.217	103.875	*	*	*	*	*	*	*
	5	100	105.928	*	104.478	105.606	102.899	104.414	103.705	*	*	*	*	*	*	*
Figure 5 and Figure 5-figure supplement 1- Source data 2
This data corresponds to Figure 5B and Figure 5-figure supplement 1C. Body weight is expressed as a percentage of the initial weight.
* No weight measurement, only survival determination.
