# Supplementary material for: Immunogenicity and safety of a live-attenuated SARS-CoV-2 vaccine candidate based on multiple attenuation mechanisms
Source: eLife journal article supplement (doi:10.7554/elife.97532), 2024-04-26
Supplement: fig5-figsupp1-data1 [file elife-97532-fig5-figsupp1-data1-v1.zip]

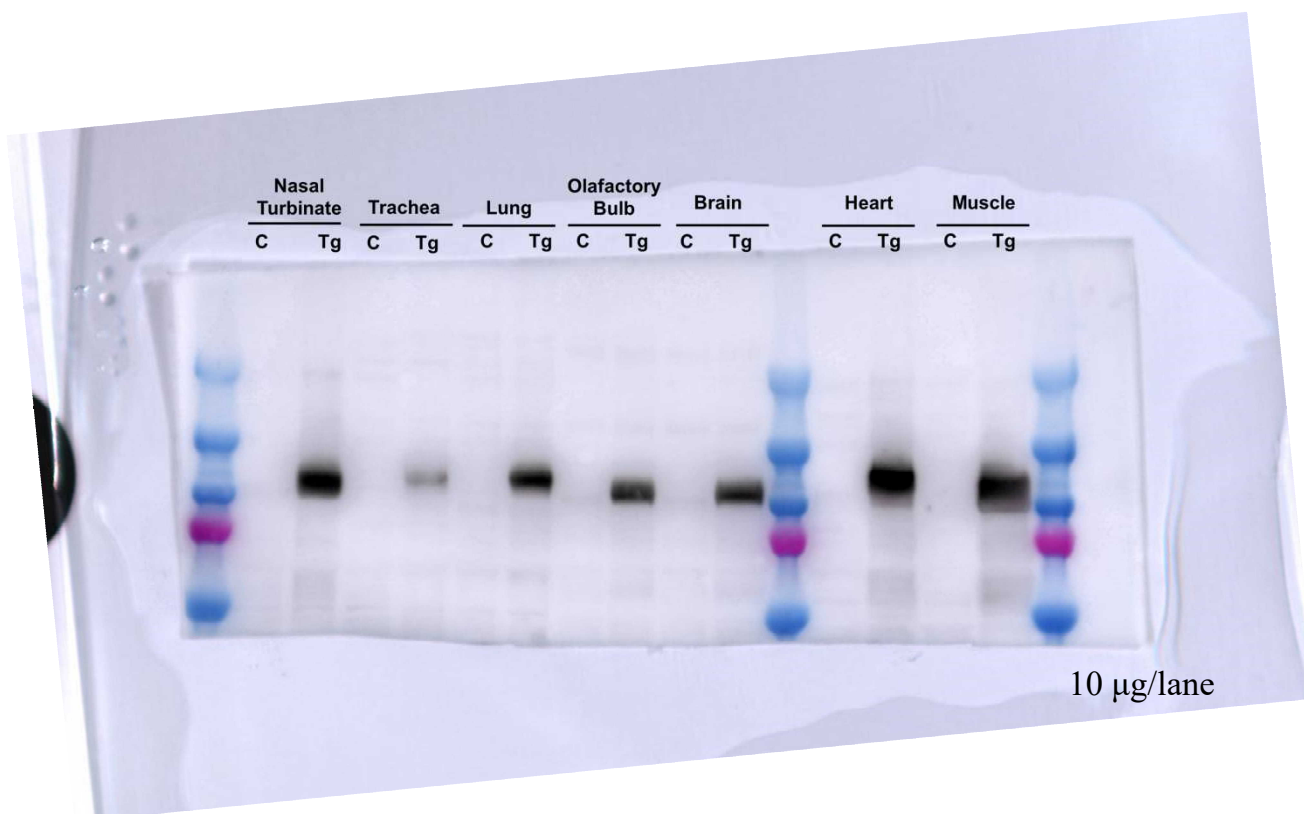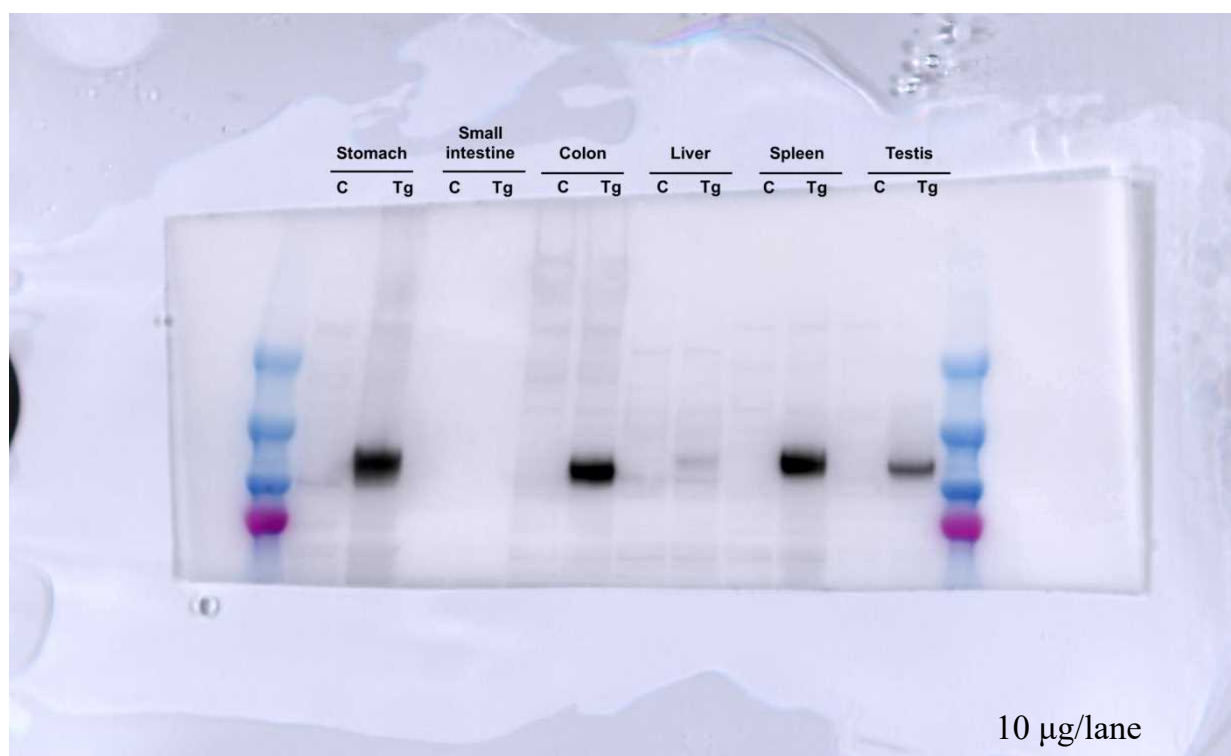

**Figure 5- figure supplement 1, Source data 1.** The upper membrane corresponding to Figure 5- figure supplement 1- upper panel, and the lower membrane corresponding to Figure 5- figure supplement 1- lower panel. Lane “C” showed control samples using C57BL/6N mice, and lane “Tg” showed the samples using hACE2-Tg mice. Precision Plus Protein™ Dual Color Standards were used as molecular weight markers (BIO-RAD).
