# Supplementary material for: Immunogenicity and safety of a live-attenuated SARS-CoV-2 vaccine candidate based on multiple attenuation mechanisms
Source: eLife. 2025 Feb 11;13:RP97532. doi: 10.7554/eLife.97532 (PMC11813227; doi:10.7554/eLife.97532)
Supplement: Figure 4—source data 1. [file elife-97532-fig4-data1.xlsx]

## Sheet: Data
Inflammation (HE)
		Nasal cavity			Lung
	Animal No.	Level 1	Level 2	Level 3
Mock	1	0	0	0	0
	2	0	0	1	0
	3	0	0	0	0
	4	0	0	0	0
D614G	1	0	1	1	1
	2	1	1	1	1
	3	0	1	1	1
	4	2	1	1	1
BK2102	1	2	0	0	0
	2	0	0	0	0
	3	2	0	0	0
	4	2	0	0	0
0: Not remarkable 1: Minimal 2: Mild 3: Moderate
IHC
		Nasal cavity			Lung
	Animal No.	Level 1	Level 2	Level 3
Mock	1	0	0	0	0
	2	0	0	0	0
	3	0	0	0	0
	4	0	0	0	0
D614G	1	1	1	2	2
	2	1	1	2	2
	3	1	0	2	2
	4	1	2	2	2
BK2102	1	0	2	0	0
	2	0	1	0	0
	3	0	1	0	0
	4	0	1	0	0
0: Not remarkable 1: Minimal 2: Mild 3: Moderate
Figure 4- Source data 1
This data corresponds to Figures 4B (Inflammation) and 4C (IHC).
Inflammation scores were determined via H&E staining. SARS-CoV-2 spike RBD-specific antibody was used for IHC staining.
