# Supplementary material for: Immunogenicity and safety of a live-attenuated SARS-CoV-2 vaccine candidate based on multiple attenuation mechanisms
Source: eLife. 2025 Feb 11;13:RP97532. doi: 10.7554/eLife.97532 (PMC11813227; doi:10.7554/eLife.97532)
Supplement: Figure 4—source data 2. [file elife-97532-fig4-data2.xlsx]

## Sheet: Data
Ct value
	Animal No.	p-0	p-1	p-2	p-3
BK2102	1	30.4364	30.1546	Undetermined	Undetermined
	2	34.1967	Undetermined	Undetermined	Undetermined
	3	34.1254	Undetermined	Undetermined	Undetermined
	4	34.166	Undetermined	Undetermined	Undetermined
	5	36.7626	Undetermined	Undetermined	Undetermined
A50-18	1	26.6881	23.6955	22.245	22.2855
	2	27.9824	24.4772	22.5988	23.5137
	3	27.0756	26.2621	21.5588	22.22
	4	30.7202	25.5489	23.6603	22.9026
	5	28.0244	24.4532	21.9895	23.1791
Figure 4- Source data 2
This data corresponds to Figure 4E.
Ct values obtained for the RT-PCR performed using RNA extracted from the nasal wash specimens.
