# Supplementary material for: Immunogenicity and safety of a live-attenuated SARS-CoV-2 vaccine candidate based on multiple attenuation mechanisms
Source: eLife. 2025 Feb 11;13:RP97532. doi: 10.7554/eLife.97532 (PMC11813227; doi:10.7554/eLife.97532)
Supplement: Table 2—source data 1. [file elife-97532-table2-data1.xlsx]

## Sheet: Data
	Animal No.	Brain (log10 PFU/g)	Lung (log10 PFU/g)
D614G 102 PFU	1	6.83614	3.82056
	2	7.75696	4.15087
	3	6.98227	3.49292
	4	6.60206	3.43457
	5	6.53242	3.88461
	Ave	6.94197	3.7567
	SD	0.438247	0.264258
B-1 ∆FCS 102 PFU	1	9.07358	5.64098
	2	8.79005	6.25204
	3	8.9284	4.4624
	4	8.13622	5.95603
	5	8.53511	5.87506
	Ave	8.69267	5.6373
	SD	0.330031	0.619102
	Animal No.	Brain (log10 PFU/g)	Lung (log10 PFU/g)
L50-33 104 PFU	1	5.7508	< 2.40
L50-33 105 PFU	2	7.23515	2.39794
Table 4- Source data 1
This data corresponds to Table 4.
The infectious virus titer in the brains and lungs was measured via a plaque assay.
The LOD was 2.4 log10 PFU/g.
