# Supplementary material for: Immunogenicity and safety of a live-attenuated SARS-CoV-2 vaccine candidate based on multiple attenuation mechanisms
Source: eLife journal article supplement (doi:10.7554/elife.97532), 2024-04-26
Supplement: table1-data2 [file elife-97532-table1-data2-v1.zip]

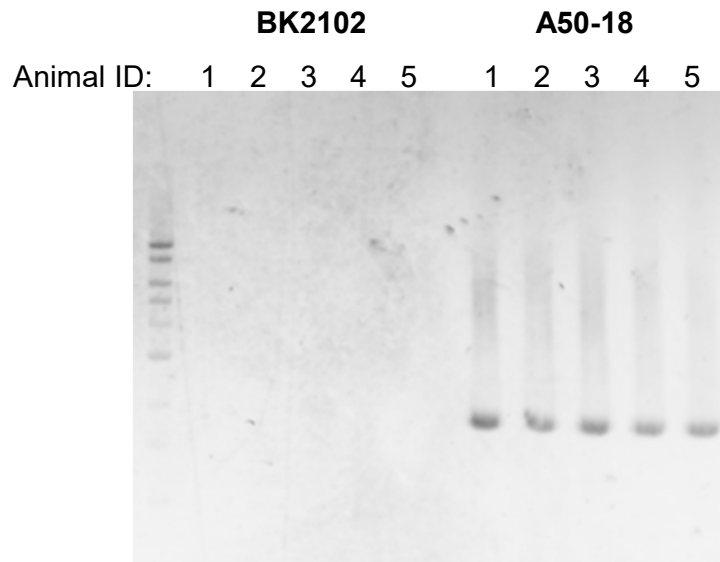

**Table 3-Source data 1.**

Table 3 was prepared based on this agarose gel electrophoresis pattern.

PCR products correspond to the amplification of the ORF7a-8 of BK2102 and A50-18 strains.

Absence of bands in BK2102 samples confirm the deletion in the vaccine candidate.

1 kb DNA Ladder was used (New England Biolabs, Inc., Cat# N3232S).
